# Supplementary material for: Association of Haptoglobin Phenotypes with Outcomes in Patients with Spontaneous Intracerebral Hemorrhage
Source: MDPI journal article supplement (doi:10.3390/life12071001), 2022-07-06
Supplement: s1 [file s1]

## SUPPLEMENTAL DATA

**Supplemental Table S1.** Univariate analysis of relevant factors associated with increased relative perihematoma edema (rPHE), defined as rPHE  $\geq 1.4$  at 96 hours, after intracerebral hemorrhage in patients with haptoglobin 2-1.

| Variables                              | rPHE < 1.4<br>(n = 36) | rPHE $\geq 1.4$<br>(n = 15) | p-value |
|----------------------------------------|------------------------|-----------------------------|---------|
| Clinical variables                     |                        |                             |         |
| Male                                   | 22 (61.1%)             | 7 (46.7%)                   | 0.343   |
| Age, years                             | 67.0 (49.0-75.5)       | 62.0 (50.5-74.5)            | 0.804   |
| Hypertension                           | 25 (69.4%)             | 9 (16.0%)                   | 0.514   |
| Diabetes mellitus                      | 5 (13.9%)              | 5 (33.3%)                   | 0.111   |
| Coronary artery disease                | 3 (8.3%)               | 2 (13.3%)                   | 0.584   |
| Hyperlipidemia                         | 2 (5.6%)               | 2 (13.3%)                   | 0.958   |
| Chronic kidney disease                 | 2 (5.6%)               | 2 (13.3%)                   | 0.347   |
| Smoking                                | 7 (19.4%)              | 5 (33.3%)                   | 0.964   |
| Antiplatelet or anticoagulation        | 6 (16.7%)              | 5 (33.3%)                   | 0.776   |
| Laboratory variables                   |                        |                             |         |
| Albumin (g/L)                          | 4.3 (4.1-4.7)          | 4.3 (4.2-4.6)               | 0.640   |
| Hemoglobin (g/dl)                      | 13.9 (12.5-14.9)       | 12.6 (10.6-14.1)            | 0.061   |
| Platelet ( $\times 10^9/L$ )           | 242 (198-267)          | 234 (200-296)               | 0.649   |
| Radiologic variables                   |                        |                             |         |
| Deep ICH                               | 33 (91.7%)             | 14 (93.3%)                  | 0.840   |
| Hematoma volume at admission (cc)      | 13.0 (8.4-22.2)        | 20.0 (11.3-25.5)            | 0.085   |
| Burr-hole trephination or craniotomy   | 5 (13.9%)              | 5 (33.3%)                   | 0.585   |
| Haptoglobin                            |                        |                             | 0.025   |
| Relative $\alpha 1$ /albumin intensity | 0.325 (0.225-0.435)    | 0.210 (0.130-0.255)         |         |

**Supplemental Table S2. Multivariate logistic regression analysis of increased relative perihematoma edema (rPHE), defined as rPHE  $\geq$  1.4 at 96 hours, after intracerebral hemorrhage in patients with haptoglobin 2-1.**

|                                        | Odds ratio | 95% Confidence interval | p-value |
|----------------------------------------|------------|-------------------------|---------|
| Diabetes mellitus                      | 3.136      | 0.589-16.705            | 0.181   |
| Hemoglobin                             | 0.768      | 0.544-1.085             | 0.134   |
| Hematoma volume at admission (cc)      | 1.050      | 0.993-1.110             | 0.088   |
| Relative $\alpha$ 1 /albumin intensity | 0.002      | 0.001-0.358             | 0.020   |

**Supplemental Table S3.** Univariate analysis of relevant factors associated with poor outcomes after intracerebral hemorrhage in patients with haptoglobin 2-1.

| Variables                              | Good outcome<br>(n = 29) | Poor outcome<br>(n = 22) | p-value |
|----------------------------------------|--------------------------|--------------------------|---------|
| Clinical variables                     |                          |                          |         |
| Male                                   | 15 (51.7%)               | 14 (63.6%)               | 0.395   |
| Age, years                             | 71.0 (51.3-76.7)         | 54.0 (49.0-70.0)         | 0.142   |
| Hypertension                           | 22 (75.9%)               | 12 (54.5%)               | 0.110   |
| Diabetes mellitus                      | 8 (27.6%)                | 2 (9.1%)                 | 0.099   |
| Coronary artery disease                | 4 (13.8%)                | 1 (4.5%)                 | 0.271   |
| Hyperlipidemia                         | 5 (17.2%)                | 2 (9.1%)                 | 0.402   |
| Chronic kidney disease                 | 2 (6.9%)                 | 2 (9.1%)                 | 0.773   |
| Smoking                                | 6 (20.7%)                | 4 (18.2%)                | 0.823   |
| Antiplatelet or anticoagulation        | 5 (17.2%)                | 4 (18.2%)                | 0.930   |
| Laboratory variables                   |                          |                          |         |
| Albumin (g/L)                          | 4.3 (4.1-4.6)            | 4.3 (4.2-4.6)            | 0.468   |
| Hemoglobin (g/dl)                      | 13.0 (12.1-14.9)         | 13.9 (12.9-14.6)         | 0.499   |
| Platelet ( $\times 10^9/L$ )           | 239 (196-274)            | 252 (200-300)            | 0.549   |
| Radiologic variables                   |                          |                          |         |
| Deep ICH                               | 26 (89.7%)               | 21 (95.4%)               | 0.445   |
| Hematoma volume at admission (cc)      | 13.0 (10.0-21.0)         | 16.0 (10.0-24.0)         | 0.401   |
| rPHE $\geq 1.4$ at 96 hours            | 8 (27.6%)                | 7 (31.8%)                | 0.743   |
| Burr-hole trephination or craniotomy   | 2 (6.9%)                 | 6 (27.3%)                | 0.048   |
| Haptoglobin                            |                          |                          | 0.856   |
| Relative $\alpha 1$ /albumin intensity | 0.310 (0.193-0.403)      | 0.285 (0.210-0.440)      |         |

rPHE indicates relative perihematoma edema

**Supplemental Table S4.** Multivariate logistic regression analysis of poor outcomes after intracerebral hemorrhage in patients with haptoglobin 2-1.

|                                      | Odds ratio | 95% Confidence interval | p-value |
|--------------------------------------|------------|-------------------------|---------|
| Hypertension                         | 0.316      | 0.089-1.115             | 0.073   |
| Age, years                           | 0.983      | 0.944-1.023             | 0.397   |
| Diabetes mellitus                    | 0.394      | 0.063-2.454             | 0.318   |
| Burr-hole trephination or craniotomy | 6.239      | 1.054-36.928            | 0.044   |
